# Supplementary material for: Validity of the Swimming Capacities and Anthropometric Indices in Predicting the Long-Term Success of Male Water Polo Players: A Position-Specific Prospective Analysis over a Ten-Year Period
Source: MDPI journal article supplement (doi:10.3390/ijerph19084463), 2022-04-07
Supplement: s1 [file s1]

**Supplementary Table S1:** Descriptive statistics for the total sample of studied water polo players at study baseline.

|                          | Valid N | Mean   | Minimum | Maximum | Std.Dev. |
|--------------------------|---------|--------|---------|---------|----------|
| Body height (cm)         | 85      | 186.30 | 173.00  | 204.60  | 6.07     |
| Body mass (kg)           | 85      | 84.82  | 63.00   | 112.00  | 9.65     |
| BMI (kg/m <sup>2</sup> ) | 85      | 24.40  | 18.62   | 32.03   | 2.13     |
| Arm span (cm)            | 85      | 194.10 | 177.50  | 212.50  | 7.43     |
| Body fat (%)             | 85      | 18.49  | 10.64   | 25.43   | 2.87     |
| 25mFS (s)                | 85      | 13.04  | 11.15   | 15.03   | 0.74     |
| 15mWS (s)                | 85      | 8.99   | 7.60    | 10.47   | 0.50     |
| 100mFS (s)               | 85      | 61.71  | 54.01   | 72.72   | 3.51     |
| 400mFS (s)               | 85      | 298.34 | 259.00  | 376.00  | 19.75    |
